# Supplementary material
Source: publisher figshare collection journal article supplement (https://f1000.figshare.com/ndownloader/files/1092628)
Supplement: Supplementary file 1 [file 1092628]

Sample	Treatment	Horse 002	Horse 003	Horse 004
1D	Control	204.9	141.6	122.8
3C	Control	109.8	184.9	135.3
6A	Control	323.3	156.7	86.5
1A	IL-1B	1202.2	349.9	461.2
1B	IL-1B	1072.4	474.0	509.2
1C	IL-1B	1185.1	434.1	405.9
2A	NSAID	436.0	390.4	182.4
2B	NSAID	434.2	205.9	169.5
2C	NSAID	639.8	270.6	158.7
2D	3.125uM	621.9	360.7	390.5
3A	3.125uM	588.6	527.2	164.8
3B	3.125uM	948.3	297.9	284.2
3D	6.25uM	566.3	235.3	219.6
4A	6.25uM	675.0	421.7	278.4
4B	6.25uM	636.9	438.0	175.9
4C	12.5uM	478.4	423.6	107.6
4D	12.5uM	748.7	234.1	183.0
5A	12.5uM	857.2	317.4	121.2
5B	25uM	779.7	162.5	106.6
5C	25uM	746.2	59.4	179.3
5D	25uM	579.1	83.7	96.5
6B	50uM	354.5	191.8	91.0
6C	50uM	423.7	249.7	77.9
6D	50uM	479.2	118.9	121.2
